# Supplementary material for: PI3Kα inhibition blocks osteochondroprogenitor specification and the hyper-inflammatory response to prevent heterotopic ossification
Source: eLife journal article supplement (doi:10.7554/elife.91779), 2023-10-09
Supplement: fig4-data2 [file elife-91779-fig4-data2-v1.zip]

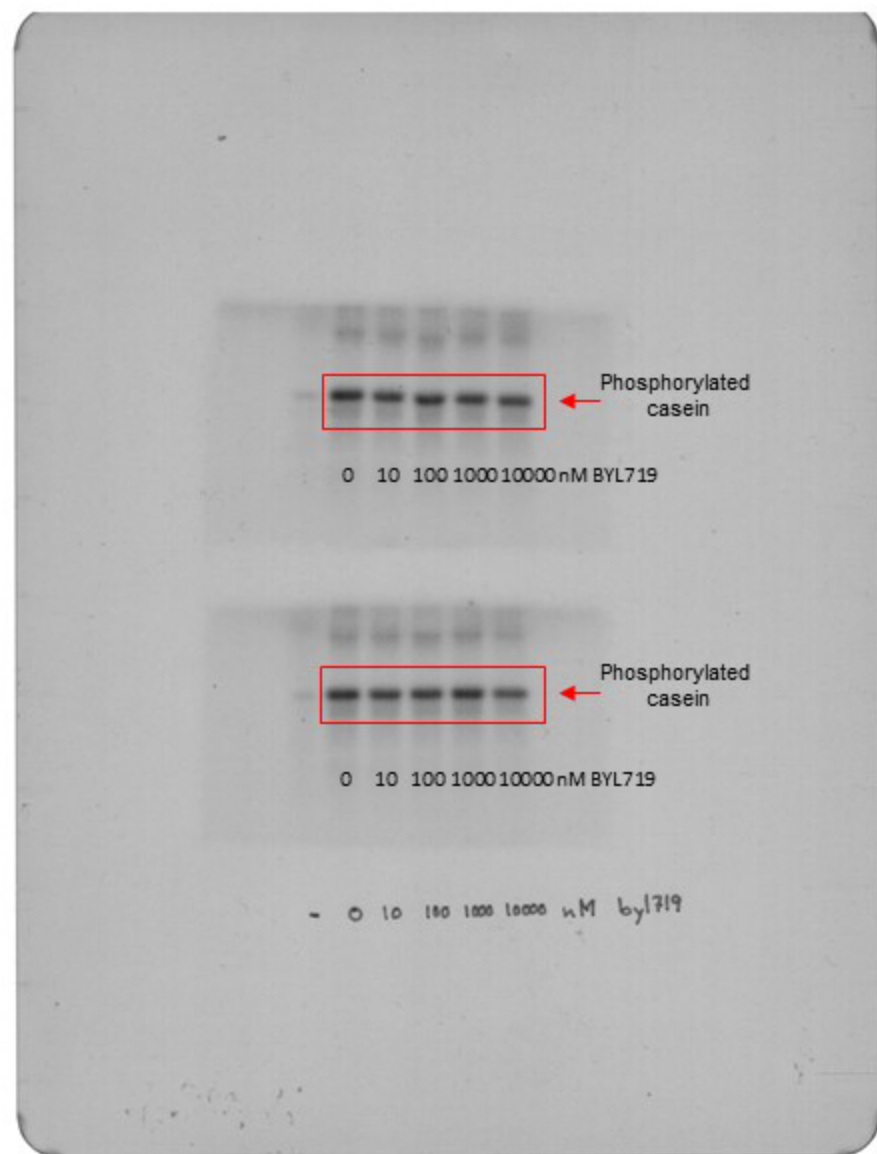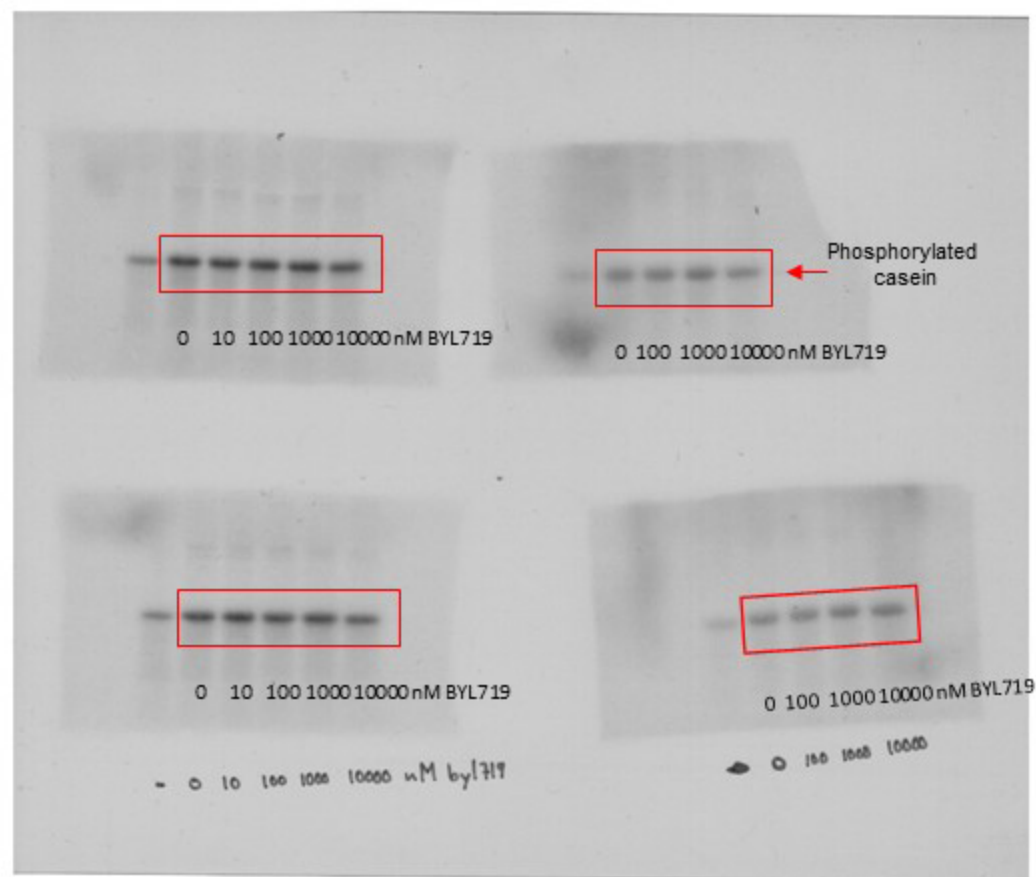

**Figure 4D:** Casein phosphorylation by ACVR1<sup>R206H</sup> kinase. Phosphorylation was performed in the presence of ACVR1<sup>R206H</sup> kinase and increasing concentrations of the PI3K inhibitor BYL719.
